# Supplementary material
Source: HighWire-hosted journal article supplement (https://jnm.snmjournals.org/highwire/filestream/102938/field_highwire_adjunct_files/0/259697_Supplemental_Data.pdf)
Supplement: 259697_Supplemental_Data.pdf [file 259697_Supplemental_Data.pdf]

Supplemental Table 1. <sup>131</sup>I-MIBG Therapy of patients with metastatic/inoperable pheochromocytoma/paraganglioma

| Reference                    | PHEO/PGL Patient (n=), type of study* | Single dose (GBq or as specified), Type of <sup>131</sup> I-MIBG**                      | Cumulative (GBq)                                           | Therapy # cycles                      | Objective CR (%) *** | Objective PR or CR+ PR (%) *** | Biochemical CR (%) ***                                              | Biochemical PR or CR + PR(%) ***                                       | Symptomatic CR (%)*** | Symptomatic PR or CR + PR*** (%)               | Duration of response or survival****                                                       |
|------------------------------|---------------------------------------|-----------------------------------------------------------------------------------------|------------------------------------------------------------|---------------------------------------|----------------------|--------------------------------|---------------------------------------------------------------------|------------------------------------------------------------------------|-----------------------|------------------------------------------------|--------------------------------------------------------------------------------------------|
| Shapiro, et al. 1991 (1)     | 28, NS                                | Mean 6.7 (3.59–11.14)<br>LSA-MIBG                                                       | 4.11–33.89 (Mean 17.72)                                    | 1–6                                   | 0                    | 7                              | 0                                                                   | 18 Catec/Metan                                                         | N/A                   | N/A                                            | Partial or minor response;mean PFS 30.5 month                                              |
| Safford, , et al. 2003 (2)   | 33, R                                 | Mean 14.36 ±4.81<br>LSA-MIBG                                                            | 2.59–45.25 (Mean 20.31)                                    | 1–6 (Median 1)                        | N/A                  | 38                             | N/A                                                                 | 60 Catec/Metan/VMA                                                     | N/A                   | 86 @ hypertension, pain, sweating, or anorexia | Median survival 4.7 years<br>5-year survival 45%                                           |
| Gonias, et al. 2009 (3)      | 50, P                                 | Median 32.60 (18.20– 42.92);<br>Median 0.44 GBq/kg<br>18.5 if no stem cells<br>LSA-MIBG | 18.20–147.67                                               | 1–3 (Median 1)                        | 9@<br>17@@           | 27@<br>50@@                    | 19@ Catec/Metan<br>24@ CgA<br><br>57 @@<br>Catec/Metan<br>20 @@ CgA | 35 @<br>Catec/Metan74@<br>CgA<br><br>71 @@<br>Catec/Metan<br>40 @@ CgA | N/A                   | N/A                                            | 64% 5-years OS<br>47% 5-year EFS                                                           |
| Castellani, et al. 2010 (4)  | Group 1: 12<br><br>Group 2: 16 , NS   | Median 5.51 (4.59–5.51)<br><br>Median 9.92 (7.4–12.95) (<br>LSA-MIBG                    | 5.51–66.60 (Median 39.41)<br><br>9.21–57.20 (Median 24.09) | 1-10 (Median 7)<br><br>1-6 (Median 2) | 8.3<br><br>12.5      | 33<br><br>31                   | 33 Catec<br><br>28 Catec                                            | 56 Catec<br><br>71 Catec                                               | N/A                   | N/A                                            | Group 1 median response duration 1.9-years<br><br>Group 2 median response duration 3-years |
| Wakabayashi, et al. 2013 (5) | 26, R                                 | Median 7.40 (0.07–0.21 GBq/kg),<br>LSA-MIBG                                             | N/A                                                        | 1–6 (Median 2)                        | 0                    | 0                              | 0                                                                   | 60                                                                     | 0                     | 52 @                                           | 50% 5-year survival                                                                        |
| Yoshinaga, et al. 2014 (6)   | 48, R                                 | (3.7–14.8),<br>Median 0.13 GBq/kg (0.049–0.21 GBq/kg)                                   | N/A                                                        | 1–4 (Median 2)                        | 0                    | 2                              | N/A                                                                 | N/A                                                                    | N/A                   | N/A                                            | NA                                                                                         |

|                              |        |                                                                                   |                         |                |            |             |                   |                                                 |                 |                                          |                                                                          |
|------------------------------|--------|-----------------------------------------------------------------------------------|-------------------------|----------------|------------|-------------|-------------------|-------------------------------------------------|-----------------|------------------------------------------|--------------------------------------------------------------------------|
|                              |        | LSA-MIBG                                                                          |                         |                |            |             |                   |                                                 |                 |                                          |                                                                          |
| Rutherford, et al. 2015 (7)  | 22, R  | Mean 9.97 (5.0–11.3),<br>LSA-MIBG                                                 | 10-50.67 (Median 20.12) | 1–9 (Median 2) | 5@         | 19@         | 5@                | 10@ Catec/Metan                                 | 5@ hypertension | 23@ hypertension                         | Median survival 11.1-years<br>68 5-year survival                         |
| Noto, et al. 2018 (8)        | 21, P  | Median 21.13 (12.02–25.75);<br>Median 0.240 GBq/kg; (0.170.31 GBq/kg)<br>HSA-MIBG | Same as single dose     | 1              | 0          | 21          | 47CgA<br>36 Metan | 80 CgA<br>64 Metan                              | N/A             | 33 hypertension                          | 2-year survival 62%                                                      |
| Wakabayashi, et al. 2019 (9) | 20, P  | 5.55 or 7.4<br>LSA-MIBG                                                           | 11.4 +/- 5.7            | 1–3            | 10@<br>5@@ | 10@<br>15@@ | N/A               | N/A                                             | N/A             | N/A                                      | PFS at 6 month 80%                                                       |
| Thorpe, et al. 2020 (10)     | 125, R | Median 18.80<br>Max 19.50,<br>LSA-MIBG                                            | Same as single dose     | 1              | 1          | 34          | N/A               | 59 defined as 20% change<br>Catec/Metan/VMA/CgA | N/A             | 75 overall<br>14 hypertension<br>42 pain | Median survival 4.3 years<br>Median PFS 2-years                          |
| Pryma, et al. 2019 (11)      | 68, P  | (18.5 or for patients < 62.5 kg 0.296 GBq/kg,<br>HSA-MIBG                         | 3.8–40.5; (Med 35.7)    | 1–2 (Median 2) | 0          | 23          | N/A<br>N/A<br>N/A | 31 Catec<br>44 Meta<br>68 CgA                   | 0               | 25 hypertension                          | Median OS 37 month, single treatment<br>Median OS 44 month, 2 treatments |

\*R = retrospective, P = prospective. NS = not specified, PHEO=pheochromocytoma, PGL=paraganglioma

\*\* LSA-MIBG= low specific activity LSA-<sup>131</sup>I-MIBG, HSA = high specific activity HSA-<sup>131</sup>I-MIBG

\*\*\* CR = complete response, PR = partial response, N/A= not available, CgA = chromogranin A, Catec = catecholamine, Metan = metanephrines, VMA= Vanillylmandelic acid

\*\*\*\*OS = overall survival, PFS = progression free survival, EFS = event free survival, TTP = time to progression

@ not well defined criteria

@ @ After second treatment

Supplemental Table 2. PRRT of patients with metastatic/inoperable pheochromocytoma/paraganglioma.

| Reference                   | PHEO/PGL Patient (n=); type of study*                         | Radiopharmaceutical single injected activity GBq treatment interval                                                                                                                                                                                                | Cumulative injected mean/median(range)GBq | Therapy # cycles | Objective CR (%) *** | Objective PR or CR+ PR (%) *** | Biochemical CR (%) *** | Biochemical PR or CR + PR(%) *** | Symptomatic CR (%)*** | Symptomatic PR or CR + PR*** (%) | Duration of response or survival**** | Adverse events                                                    |
|-----------------------------|---------------------------------------------------------------|--------------------------------------------------------------------------------------------------------------------------------------------------------------------------------------------------------------------------------------------------------------------|-------------------------------------------|------------------|----------------------|--------------------------------|------------------------|----------------------------------|-----------------------|----------------------------------|--------------------------------------|-------------------------------------------------------------------|
| van Essen, et al. 2006 (12) | 12 (1 PHEO, 6 sPGL, 5 HNPG, 9 metastatic, 3 inoperable);<br>P | <sup>177</sup> Lu-DOTATATE<br>7.4 GBq/cycle ×4;<br>6–10 weeks                                                                                                                                                                                                      | (14.8–29.6)                               | 2-4              | 0                    | 9                              | N/A                    | N/A                              | N/A                   | N/A                              | N/A                                  | 1 MDS<br><br>1 Grade 4 hematotoxicity                             |
| Forrer, et al. 2008 (13)    | 28 (5 PHEO, 23 PGL,incurable);<br>R                           | <sup>90</sup> Y-DOTATOC<br>7.4GBq/m2/cycle x2; every 8 weeks (n = 19)<br>or<br>1.35GBq/m2/cycle,x4;<br>every 6 weeks (n = 6)<br><sup>90</sup> Y-DOTATOC/ <sup>177</sup> Lu--DOTATOC<br>3.7 GBq/m <sup>2</sup> × 1 cycle/7.4 GBq × 2 cycles;<br>every 8 weeks (n=3) | N/A                                       | 1-4              | 0                    | 7 all groups                   | N/A                    | N/A                              | N/A                   | N/A                              | TTP > 18m                            | No Grade 2 or greater hematotoxicity, no renal toxicity           |
| Imhof, et al. 2011 (14)     | 39 (11 PHEO, 28 PGL);<br>P                                    | <sup>90</sup> Y-DOTATOC<br>3.7 GBq/m2/cycle                                                                                                                                                                                                                        | N/A                                       | Median 2 (1–10)* | 0                    | 36 for PHEO, 11 for PGL #      | N/A                    | 18 for PHEO, 14 for PGL#         | N/A                   | 46 for PHEO, 21 for PGL#         | Mean survival:<br>PHEO 32m /PGL82 m  | ***12.8% Grade 3-4 hemaotoxicity<br>9.2% Grade 4–5 nephrotoxicity |

|                           |                                                                                               |                                                                                                                                   |           |                       |                                                  |                                               |                      |                       |                              |                               |                                         |                                         |
|---------------------------|-----------------------------------------------------------------------------------------------|-----------------------------------------------------------------------------------------------------------------------------------|-----------|-----------------------|--------------------------------------------------|-----------------------------------------------|----------------------|-----------------------|------------------------------|-------------------------------|-----------------------------------------|-----------------------------------------|
| Puranik, et al. 2015 (15) | 9 HNPGL (2 metastatic, 7 inoperable); P                                                       | <sup>90</sup> Y-DOTATOC alone (n=5)<br>1.5–5.7<br><br>Or combined<br><sup>177</sup> Lu-DOTATATE 5.4-7.5 (n=4)<br>every 3–6 months | N/A       | Median 2 (2–4)        | 0<br><br>@@@<br><sup>68</sup> Ga-DOTATOC:<br>N/A | 0<br><br>@@@ <sup>68</sup> Ga-DOTATOC: 44     | N/A                  | N/A                   | N/A                          | N/A                           |                                         | No renal or hematological toxicity.     |
| Pinato et al. 2016 (16)   | 5 PGL (all <i>SDHB</i> and metastatic); R                                                     | <sup>177</sup> Lu-DOTATATE<br>6.6–7.6 GBq/cycle<br>every 12 weeks                                                                 | N/A       | Median 3 (1–4 cycles) | N/A                                              | 20 PR                                         | N/A                  | N/A                   | N/A                          | N/A                           | Mean OS 53 months<br>Mean PFS 36 months | 20% Pulmonary toxicity possibly related |
| Kong, et al. 2017 (17)    | 20 (8 PHEO, 12 PGL)<br><br>(8 <i>SDHx</i> ) 14 uncontrolled HTN; 6 metastatic or recurrent; R | <sup>177</sup> Lu-DOTATATE<br>N/A<br>9 with radiosensitizer chemotherapy<br>every 6–10 weeks                                      | Median 22 | Median 4 cycles       | 0<br><br>@@@<br><sup>68</sup> Ga-DOTATOC:<br>0   | 29<br><br>@@@ <sup>68</sup> Ga-DOTATOC:<br>47 | 0 Metan<br><br>0 CgA | 57 Metan<br><br>54CgA | 15symptom#<br>0hypertension# | 76symptom#<br>62hypertension# | Median PFS 39 m,<br>medianOS 29m        | 10% Grade 3 thrombocytopenia            |
| Nastos, et al. 2017 (18)  | 11 (1 PHEO, 10 PGL; locally                                                                   | <sup>90</sup> Y-DOTATATE (n=8)<br>3.2 GBq/cycle                                                                                   |           | 3–4 cycles            | N/A                                              | 100                                           | N/A                  | N/A                   | N/A                          | N/A                           | Mean OS 61 months                       | Grade 3–4 renal toxicity 9%             |

|                               |                                                                           |                                                                                                                                                |                       |                           |   |       |     |        |     |                 |                                                                    |                                                                                                 |
|-------------------------------|---------------------------------------------------------------------------|------------------------------------------------------------------------------------------------------------------------------------------------|-----------------------|---------------------------|---|-------|-----|--------|-----|-----------------|--------------------------------------------------------------------|-------------------------------------------------------------------------------------------------|
|                               | advanced or metastatic)<br><br>11 PHEO/PGL treated with MIBG; R           | or<br><sup>177</sup> Lu-DOTATATE (n=1)<br>7.4 GBq/cycle<br>or<br>Y-90 or <sup>177</sup> Lu-DOTATATE with-131 MIBG (n = 2)<br>every 10–12 weeks | (3.6–17.7)<br><br>N/A |                           |   |       |     |        |     |                 | PFS 38.5 months<br>EFS 17.9 months                                 | Grade 3–4 Neutropenia 9%<br><br>Thrombocytopenia 9%                                             |
| Hamiditabar, et al. 2017 (19) | 5 (1PHEO, 4PGL)<br><br>P                                                  | <sup>177</sup> Lu-DOTATATE<br>7.4 GBq/cycle                                                                                                    | N/A                   | 1–6 cycles                | 0 | 0     | N/A | N/A    | N/A | N/A             | N/A                                                                | No Grade 3–4 renal toxicity<br><br>Hematologic toxicity ***                                     |
| Demirci, et al. 2018 (20)     | 12 PHEO/PGL;<br>R                                                         | <sup>177</sup> Lu-DOTATATE<br>Median 5.04 GBq (3.7–8.1 GBq)                                                                                    | N/A                   | Median 6 cycles (2–12)*** | 0 | 50 PR | N/A | N/A    | N/A | N/A             | Mean PFS 31 months,<br>Mean OS 52 months                           | 2%Gr3<br>***hematologic<br>1% Creatinine > 2 mg/dl                                              |
| Zandee, et al. 2019 (21)      | 30 (3 PHEO, 10 PGL, 17 HNPGL)<br>16 SDHx (inoperable or metastatic);<br>R | <sup>177</sup> Lu-DOTATATE<br>7.4 GBq/cycle<br>Every 6–12 weeks                                                                                | 14.8–29.6             | 1–4                       | 0 | 23    | 33  | 50     | N/A | N/A             | Median PFS:<br>91 months HNPGL<br>10 months PHEO<br>18 months sPGL | Grade 3 anemia 6.7%<br><br>20% Grade 3–4 hematotoxicity<br>MDS 3%<br>Catecholamine release 6.7% |
| Yadav, et al. 2019 (22)       | 25 (8 sPGL, 17HNPGL; 20 metastatic, 5 localized);<br>R                    | <sup>177</sup> Lu-DOTATATE + capecitabine<br>5.5–7.4 GBq/cycle<br>every 3 months                                                               | Mean 22.9 (14.4–50)   | Median 3 (2–8)            | 0 | 28    | 0   | CgA 28 | N/A | 43 hypertension | Median PFS 32m                                                     | No Gr 2 or greater toxicity                                                                     |

|                                     |                                                                                     |                                                                                                                                                          |                            |                                        |                                                                         |                                                                          |                         |                        |     |     |                                                                                |                                          |
|-------------------------------------|-------------------------------------------------------------------------------------|----------------------------------------------------------------------------------------------------------------------------------------------------------|----------------------------|----------------------------------------|-------------------------------------------------------------------------|--------------------------------------------------------------------------|-------------------------|------------------------|-----|-----|--------------------------------------------------------------------------------|------------------------------------------|
| Vyakarana<br>m, et al.<br>2019 (23) | 22 (19 PHEO, 13<br>PGL; 2 localized,<br>20 metastatic, 7<br><i>SDHx</i> );<br><br>R | <sup>177</sup> Lu-DOTATATE<br><br>7.4 GBq/cycle x4m(n=3)<br><br>7.4 GBq/cycle until renal<br>dose 23 Gy or 2 Gy whole<br>body(n=19)<br><br>Every 6-8 wks | Median 29.6<br>(22.2–81.4) | Median 4<br>cycles<br>(range 3–<br>11) | 0<br><br>@@@ <sup>177</sup><br>Lu-<br>DOTAT<br>ATE<br>imaging:<br><br>0 | 9<br><br>@@@<br><br><sup>177</sup> Lu-<br>DOTATATE<br>imaging:<br><br>47 | N/ACatec<br><br>N/A CgA | 25 Catec<br><br>40 CgA | N/A | 40# | Median OS<br>49.6 months<br>(Range 8–<br>139), PFS<br>21.6 months<br>(3.7–138) | No Grade 3- 4<br>hematologic or<br>renal |
|-------------------------------------|-------------------------------------------------------------------------------------|----------------------------------------------------------------------------------------------------------------------------------------------------------|----------------------------|----------------------------------------|-------------------------------------------------------------------------|--------------------------------------------------------------------------|-------------------------|------------------------|-----|-----|--------------------------------------------------------------------------------|------------------------------------------|

\*PHEO= pheochromocytoma, PGL=paraganglioma, HNPG= head neck paraganglioma, sPGL= sympathetic paraganglioma, R = retrospective, P = prospective, NA= not available, SDH= succinate dehydrogenase complex

\*\*\* based on anatomical imaging PR = partial response, CgA = chromogranin A,

@@@functional imaging response EORTC criteria (CR complete disappearance on functional imaging, PR ≥50% reduction in SUV. Other used improvement by 1 point in Krenning score.

\*\*\*\*OS = overall survival, PFS = progression free survival, EFS = event free survival

#not well defined criteria

## SUPPLEMENTAL TABLE REFERENCES

1. Shapiro B, Sisson IC, Wieland DM, et al. Radiopharmaceutical therapy of malignant pheochromocytoma with i-131 metaiodobenzylguanidine: Results from ten years of experience. *J Nucl Biol Med.* 1991;35:269-276.
2. Safford SD, Coleman RE, Gockerman JP, et al. Iodine -131 metaiodobenzylguanidine is an effective treatment for malignant pheochromocytoma and paraganglioma. *Surgery.* 2003;134:956-962.
3. Gonas S, Goldsby R, Matthay KK, et al. Phase ii study of high-dose [131i]metaiodobenzylguanidine therapy for patients with metastatic pheochromocytoma and paraganglioma. *J Clin Oncol.* 2009;27:4162-4168.
4. Castellani MR, Seghezzi S, Chiesa C, et al. I-131-mibg treatment of pheochromocytoma: Low versus intermediate activity regimens of therapy. *Quarterly Journal of Nuclear Medicine and Molecular Imaging.* 2010;54:100-113.
5. Wakabayashi H, Taki J, Inaki A, et al. Prognostic values of initial responses to low-dose (131)i-mibg therapy in patients with malignant pheochromocytoma and paraganglioma. *Ann Nucl Med.* 2013;27:839-846.
6. Yoshinaga K, Oriuchi N, Wakabayashi H, et al. Effects and safety of (1)(3)(1)i-metaiodobenzylguanidine (mibg) radiotherapy in malignant neuroendocrine tumors: Results from a multicenter observational registry. *Endocr J.* 2014;61:1171-1180.
7. Rutherford MA, Rankin AJ, Yates TM, et al. Management of metastatic phaeochromocytoma and paraganglioma: Use of iodine-131-meta-iodobenzylguanidine therapy in a tertiary referral centre. *QJM.* 2015;108:361-368.
8. Noto RB, Pryma DA, Jensen J, et al. Phase 1 study of high-specific-activity i-131 mibg for metastatic and/or recurrent pheochromocytoma or paraganglioma. *J Clin Endocrinol Metab.* 2018;103:213-220.
9. Wakabayashi H, Inaki A, Yoshimura K, et al. A phase i clinical trial for [(131)i]meta-iodobenzylguanidine therapy in patients with refractory pheochromocytoma and paraganglioma. *Sci Rep.* 2019;9:7625.
10. Thorpe MP, Kane A, Zhu J, Morse MA, Wong T, Borges-Neto S. Long-term outcomes of 125 patients with metastatic pheochromocytoma or paraganglioma treated with 131-i mibg. *J Clin Endocrinol Metab.* 2020;105:E494-E501.
11. Pryma DA, Chin BB, Noto RB, et al. Efficacy and safety of high-specific-activity (131)i-mibg therapy in patients with advanced pheochromocytoma or paraganglioma. *J Nucl Med.* 2019;60:623-630.
12. van Essen M, Krenning EP, Kooij PP, et al. Effects of therapy with lu-177-dota(0),tyr(3) octreotate in patients with paraganglioma, meningioma, small cell lung carcinoma, and melanoma. *Journal of Nuclear Medicine.* 2006;47:1599-1606.
13. Forrer F, Riedweg I, Maecke HR, Mueller-Brand J. Radiolabeled dotatoc in patients with advanced paraganglioma and pheochromocytoma. *Q J Nucl Med Mol Imaging.* 2008;52:334-340.
14. Imhof A, Brunner P, Marincek N, et al. Response, survival, and long-term toxicity after therapy with the radiolabeled somatostatin analogue [90y-dota]-toc in metastasized neuroendocrine cancers. *J Clin Oncol.* 2011;29:2416-2423.

15. Puranik AD, Kulkarni HR, Singh A, Baum RP. Peptide receptor radionuclide therapy with (90)y/ (177)lu-labelled peptides for inoperable head and neck paragangliomas (glomus tumours). *Eur J Nucl Med Mol Imaging*. 2015;42:1223-1230.
16. Pinato DJ, Black JR, Ramaswami R, Tan TM, Adjogatse D, Sharma R. Peptide receptor radionuclide therapy for metastatic paragangliomas. *Med Oncol*. 2016;33:47.
17. Kong G, Grozinsky-Glasberg S, Hofman MS, et al. Efficacy of peptide receptor radionuclide therapy for functional metastatic paraganglioma and pheochromocytoma. *J Clin Endocrinol Metab*. 2017;102:3278-3287.
18. Nastos K, Cheung VTF, Toumpanakis C, et al. Peptide receptor radionuclide treatment and (131)i-mibg in the management of patients with metastatic/progressive phaeochromocytomas and paragangliomas. *J Surg Oncol*. 2017;115:425-434.
19. Hamiditabar M, Ali M, Roys J, et al. Peptide receptor radionuclide therapy with 177lu-octreotate in patients with somatostatin receptor expressing neuroendocrine tumors: Six years' assessment. *Clin Nucl Med*. 2017;42:436-443.
20. Demirci E, Kabasakal L, Toklu T, et al. 177lu-dotatate therapy in patients with neuroendocrine tumours including high-grade (who g3) neuroendocrine tumours: Response to treatment and long-term survival update. *Nucl Med Commun*. 2018;39:789-796.
21. Zandee WT, Feelders RA, Smit Duijzentkunst DA, et al. Treatment of inoperable or metastatic paragangliomas and pheochromocytomas with peptide receptor radionuclide therapy using 177lu-dotatate. *Eur J Endocrinol*. 2019;181:45-53.
22. Yadav MP, Ballal S, Bal C. Concomitant (177)lu-dotatate and capecitabine therapy in malignant paragangliomas. *EJNMMI Res*. 2019;9:13.
23. Vyakaranam AR, Crona J, Norlen O, et al. Favorable outcome in patients with pheochromocytoma and paraganglioma treated with (177)lu-dotatate. *Cancers (Basel)*. 2019;11.
